# Supplementary material for: Sustainable nanofiber synthesis from corn protein meal for enhanced vitamin E and curcumin nutrient delivery in food systems
Source: Royal Society of Chemistry journal article supplement (doi:10.1039/d3fb00236e), 2024-01-01
Supplement: d3fb00236e1.pdf [file d3fb00236e1.pdf]

“Supporting Information for Publication of”

**"Sustainable Nanofiber Synthesis from Corn Protein Meal for Enhanced  
Vitamin E and Curcumin Nutrient Delivery for Food System"**

**Vibhu Mishra, Dalveer Kaur, Saumya Singh, Devendra Pratap Singh, Meena Krishania\***

Center of Innovative and Applied Bioprocessing (CIAB), Sector-81, Mohali-140306, India

\* Correspondence E-mail: [meena@ciab.res.in](mailto:meena@ciab.res.in)

The maximum solubilized protein content of CPM was obtained at 70% ethanol concentration (supporting fig 1a) which was used for the NFs synthesis and solubility of CPM at different ethanol concentration was observed by using UV-spectrum (supporting fig 1b). Solvent:Antisolvent system play a significant role on the size of nanoparticles (supporting fig 1c). Colour change was observed in the CPM before and after nanoparticle synthesis (supporting fig 1d).

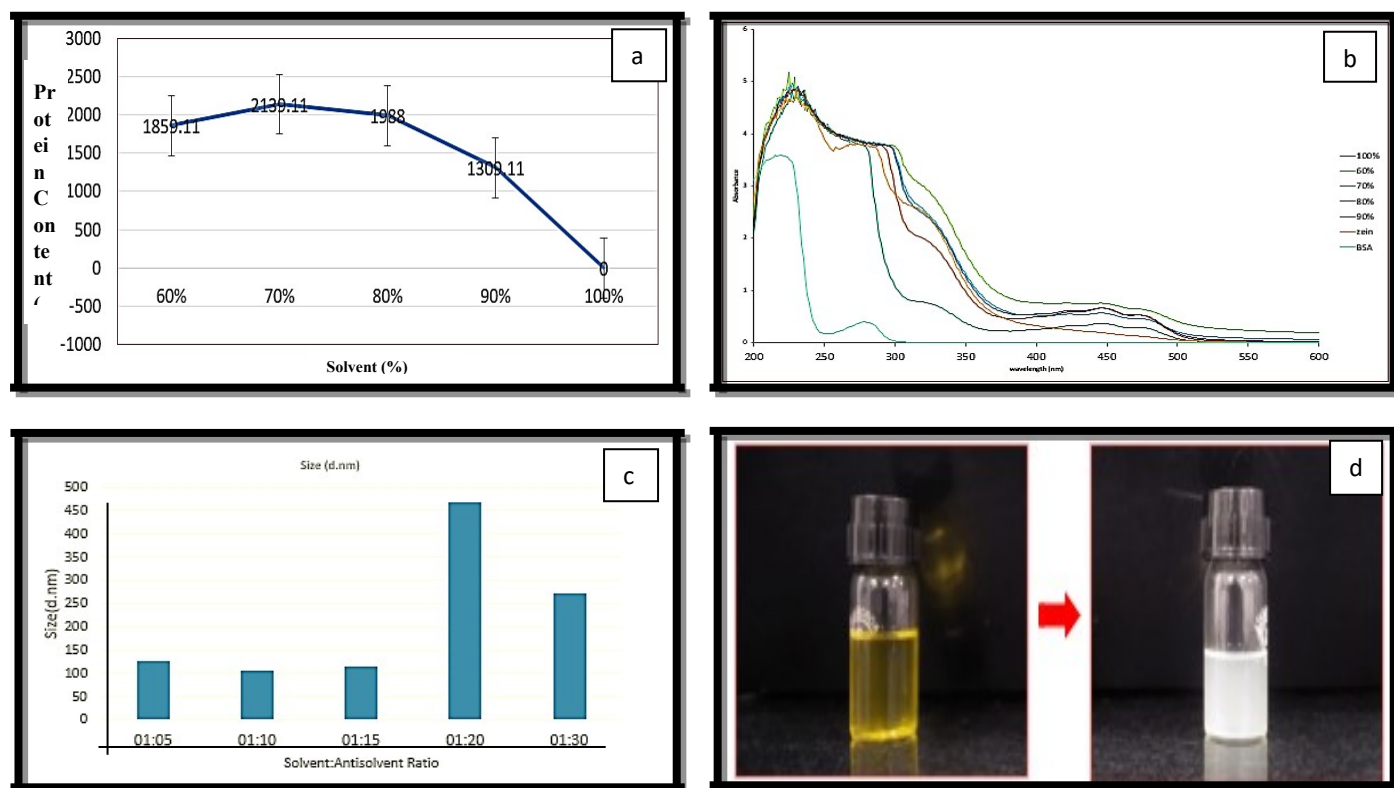

**Supporting fig. 1** For the preparation from nano particle from corn protein meal, using different ratio of a) solvent, b) its UV spectrum, for high protein solubility, the solvent: anti-solvent ratio effect on c) size of nano-particles of corn protein meal and d) colour variation before and after the nano particle preparation of corn protein meal.

## Electrospinning parameters

Electrospinning parameter for nanofibers synthesis given in supporting information [table 1](#).

**Supporting table 1: Electrospinning parameter for nanofibers synthesis.**

| <i>Sample No.</i> | <i>Sample Name</i> | <i>Sample content</i> | <i>Flow rate (ml/hr)</i> | <i>Potential (kV)</i> | <i>TCD (cm)</i> | <i>PVP (%)</i> |
|-------------------|--------------------|-----------------------|--------------------------|-----------------------|-----------------|----------------|
| 1                 | CpN                | CPM Nano-particles    | 0.3                      | 10                    | 12              | 1              |
| 2                 | CpN-V              | CpN + Vitamin E       | 0.3                      | 10                    | 12              | 1              |
| 3                 | CpN-V-CrN          | CpN + Vitamin E + CrN | 0.3                      | 10                    | 12              | 1              |
